# Supplementary material
Source: Springer Nature journal article supplement (https://www.springermedizin.de/resource/supplementary/12885_2009_1928_MOESM2_ESM.pdf/9460114)

**A**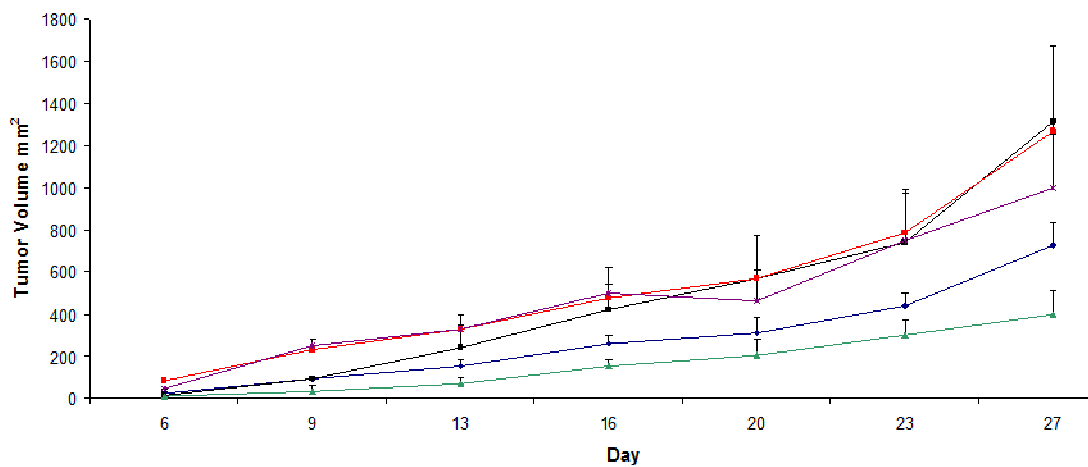**B**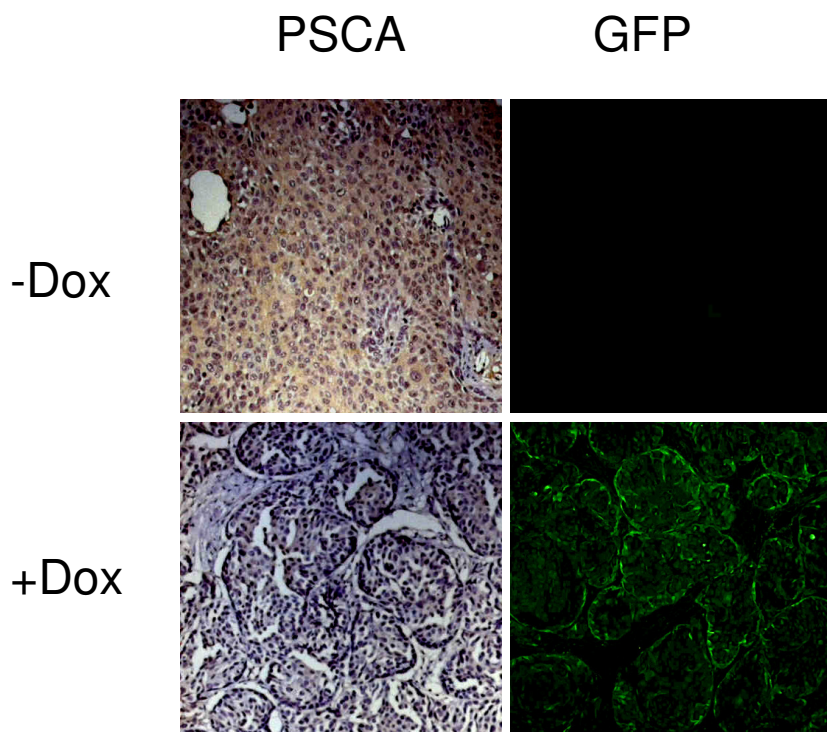

Supplement: MOESM2 [file 9460114]
